# Supplementary material
Source: PubMed Central journal article supplement (PMC8783372)
Supplement: NIHMS1769661-supplement-Prakash_et_al_suppl.pdf [file NIHMS1769661-supplement-Prakash_et_al_suppl.pdf]

## Supplementary material

### Appendix 1s Search Strategies:

**Databases:** MEDLINE, Scopus, CINAHL, Cochrane Database of Systematic Reviews

#### MEDLINE search strategy:

((("Gastric Bypass"[Mesh] OR bypass OR transgastric OR roux-en-y OR gastrogastrostomy OR gastrojejunostom\* OR "surgically altered") AND ("Cholangiopancreatography, Endoscopic Retrograde"[Mesh] OR endoscopic retrograde cholangiopancreatograph\* OR ERCP)))

OR (("Endosonography"[Mesh] OR endoscopic ultrasound OR EUS) AND transgastric)

- Filters/limits: January 1<sup>st</sup> 2011- September 1<sup>st</sup> 2020
- Date searched: September 1<sup>st</sup>, 2020
- # of records identified: 716

#### Scopus search strategy:

(( endosonography OR ( endoscopic AND ultrasound ) OR eus ) AND ( directed ) AND (transgastric )) OR ( ( gastric AND bypass OR bypass OR roux-en-y OR gastrogastrostomy OR ( surgically AND altered ) ) AND ( ( cholangiopancreatography AND endoscopic AND retrograde ) OR ercp ) )

- Filters/limits: January 1<sup>st</sup> 2011- September 1<sup>st</sup> 2020
- Date searched: September 1st, 2020
- # of records identified: 1109

#### CINAHL search strategy:

(MH "Gastric Bypass" OR bypass OR transgastric OR roux-en-y OR gastrogastrostomy OR gastrojejunostom\* OR "surgically altered") AND ((MH "Cholangiopancreatography, Endoscopic Retrograde" OR endoscopic retrograde cholangiopancreatograph\* OR ERCP)

OR

(MH "Cholangiopancreatography, Endoscopic Retrograde" OR endosonograph\* OR endoscopic ultrasound OR EUS) AND transgastric

- Filters/limits: January 1<sup>st</sup> 2011- September 1<sup>st</sup> 2020
- Date searched: September 1st, 2020
- # of records identified: 285

#### Cochrane Database of Systematic Reviews search strategy:

(gastric OR bypass OR transgastric) AND (endoscopic retrograde cholangiopancreatograph\* OR ERCP OR endoscopic ultrasound)

- Filters/limits: Cochrane Reviews, Date: January 1<sup>st</sup> 2011- September 1<sup>st</sup> 2020
- Date searched: September 1<sup>st</sup> 2020
- # of records identified: 33

**TOTAL # of records identified through database searching: 2143**
